# Supplementary material for: Sustainable Valorization of Sambucus nigra L. Berries: From Crop Biodiversity to Nutritional Value of Juice and Pomace
Source: MDPI journal article supplement (doi:10.3390/foods11010104), 2021-12-31
Supplement: s1 [file s1]

# Sustainable valorization of *Sambucus nigra* L. berries: from crop biodiversity to nutritional value of juice and respective pomace

Carina Pedrosa Costa <sup>1</sup>, Samuel Patinha <sup>2</sup>, Alisa Rudnitskaya <sup>3</sup>, Sónia A. O. Santos <sup>2</sup>, Armando J. D. Silvestre <sup>2</sup> and Sílvia M. Rocha <sup>1,\*</sup>

<sup>1</sup> LAQV-REQUIMTE & Department of Chemistry, Campus Universitário Santiago, University of Aveiro, 3810-193 Aveiro, Portugal; carina.pedrosa@ua.pt

<sup>2</sup> CICECO-Aveiro Institute of Materials & Department of Chemistry, Campus Universitário Santiago, University of Aveiro, 3810-193 Aveiro, Portugal; jsamuelpatinha@ua.pt (S.P.); santos.sonia@ua.pt (S.A.O.A.); armsil@ua.pt (A.J.D.S.)

<sup>3</sup> CESAM & Department of Chemistry, University of Aveiro, Campus Universitário Santiago, 3810-193 Aveiro, Portugal; alisa@ua.pt

\* Correspondence: smrocha@ua.pt; Tel.: +351-234-401524

## Supplementary Information

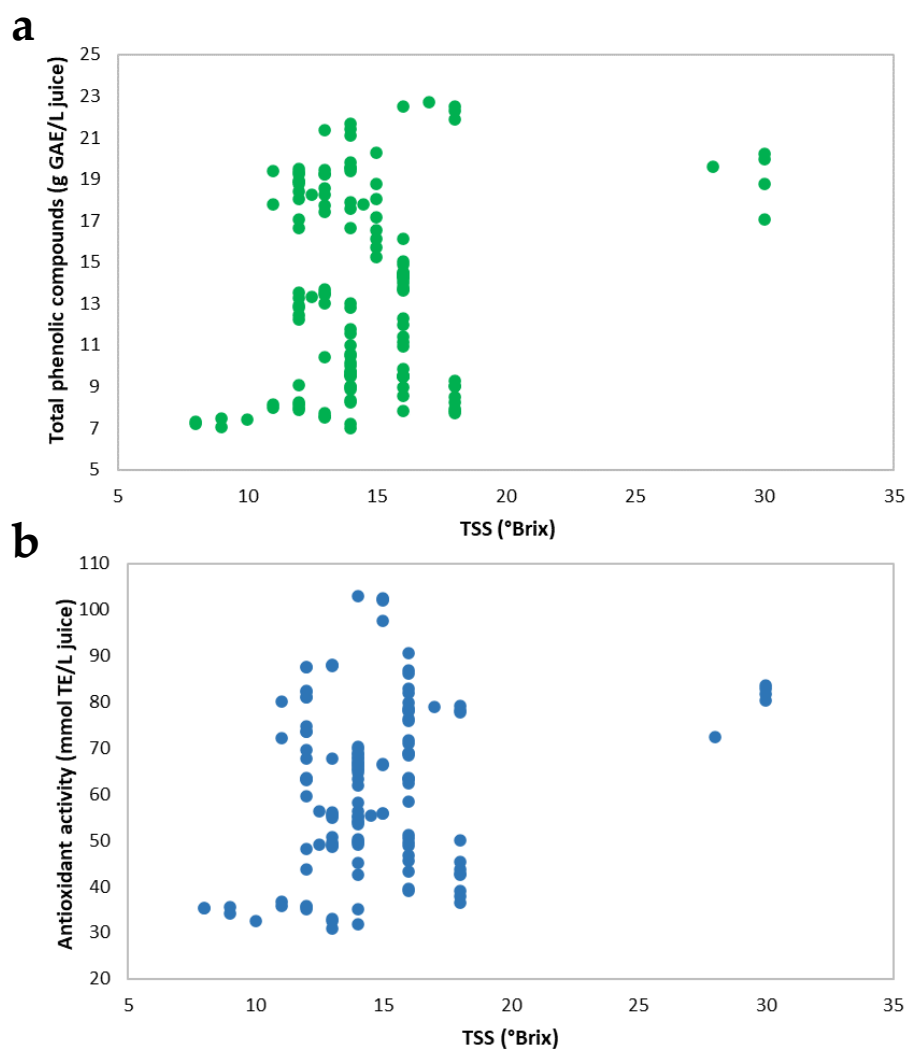

**Figure S1.** Dispersion of the (a) total phenolic, and (b) antioxidant activity values of all elderberries under study according to the respective TSS expressed as °Brix, showing, in each graphic, a positive association between the levels of variation of both parameters through ripening.

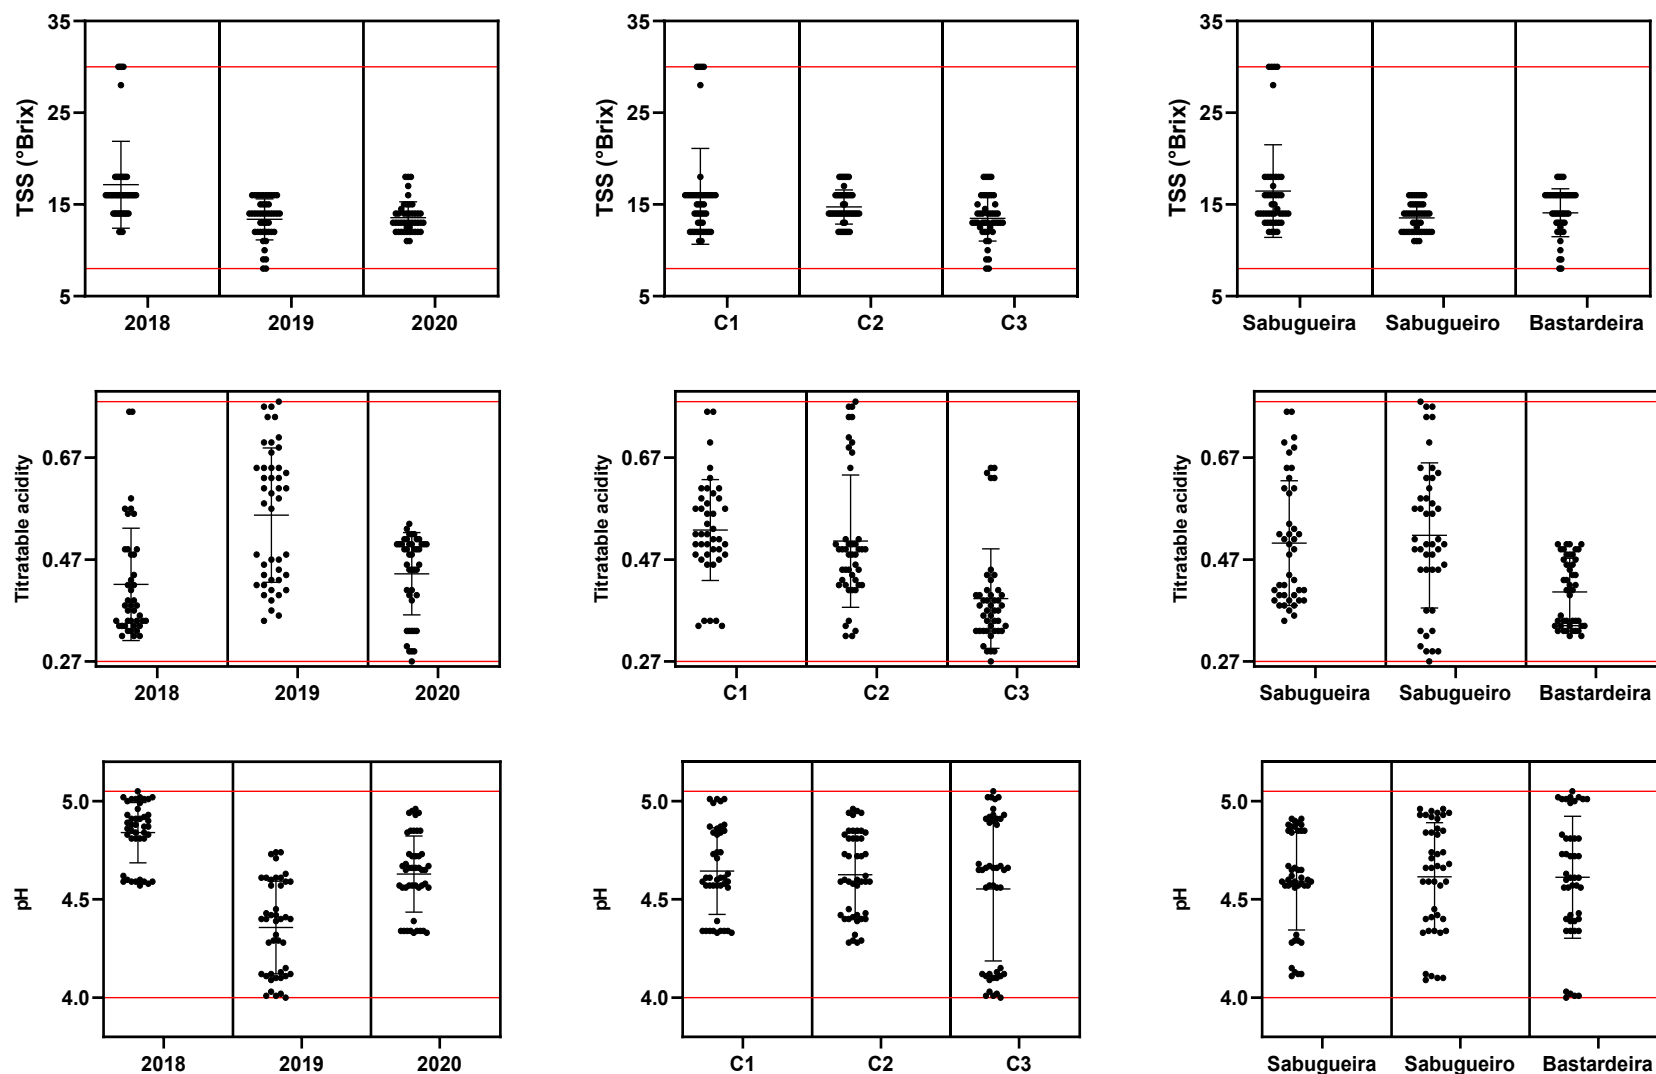

**Figure S2.** Descriptive statistics of physicochemical content of ripe berries from *Sambucus nigra* L., from three consecutive harvests (2018-2020), three fields (C1, C2 and C3) and cultivars 'Sabugueira', 'Sabugueiro' and 'Bastardeira'. Bars represent 25<sup>th</sup> and 75<sup>th</sup> percentiles with median in middle. The red line above and below represents the maximum and minimum, respectively. Results for TSS expressed as °Brix, and titratable acidity expressed as g citric acid/L juice.

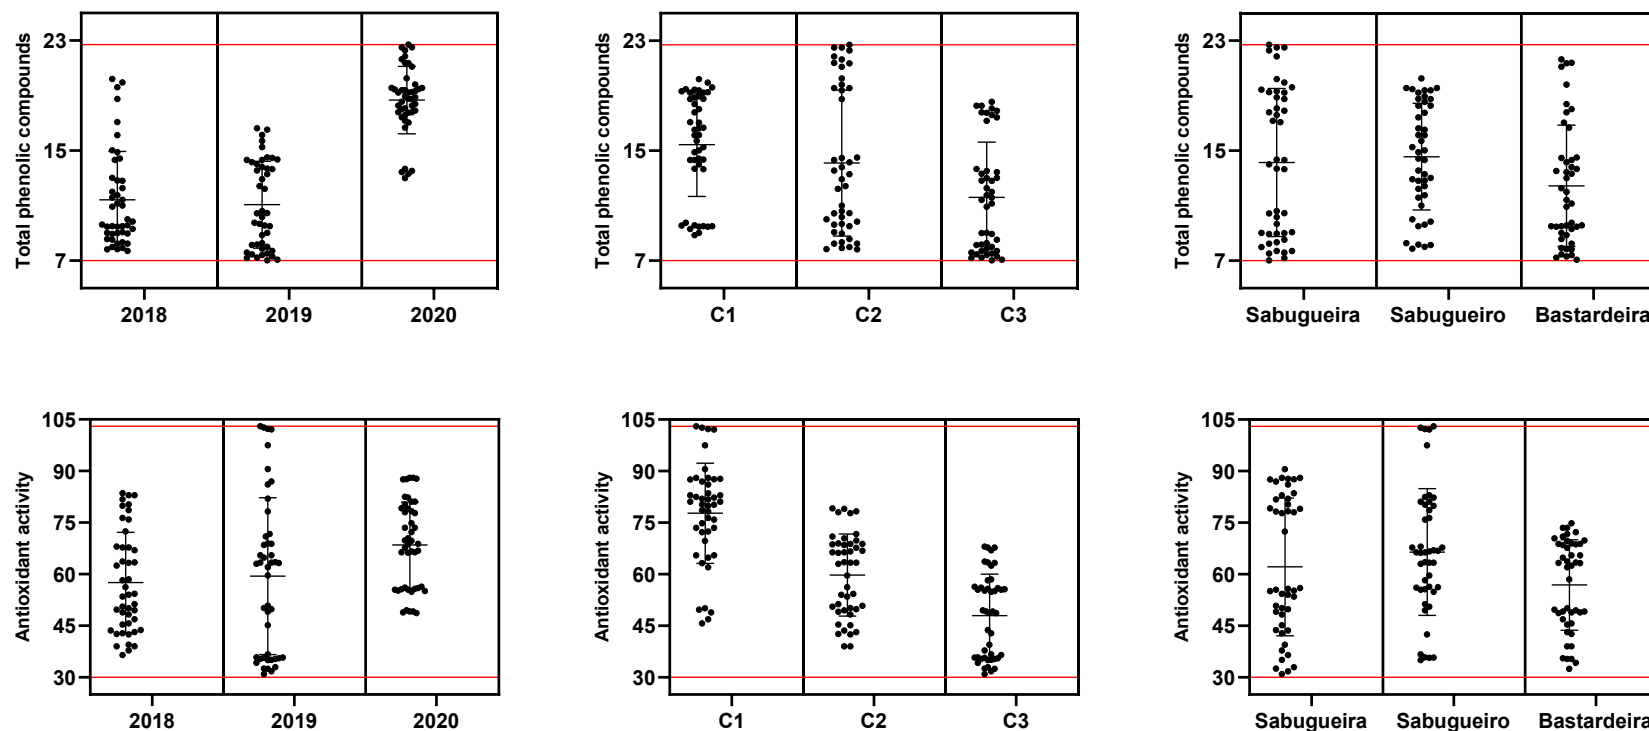

**Figure S3.** Descriptive statistics of total phenolic content and antioxidant activity reported ripe berries from *Sambucus nigra* L., from three consecutive harvests (2018-2020), three fields (C1, C2 and C3) and cultivars 'Sabugueira', 'Sabugueiro' and 'Bastardeira'. Bars represent 25<sup>th</sup> and 75<sup>th</sup> percentiles with median in middle. The red line above and below represents the maximum and minimum, respectively. Results for total phenolic compounds expressed as g GAE/L juice, and antioxidant activity expressed as mmol TE/L juice.
